# Hospitalizations for Respiratory Syncytial Virus Among Adults in the United States, 1997–2012

Susan T. Pastula,<sup>1</sup> Judith Hackett,<sup>2</sup> Jenna Coalson,<sup>1</sup> Xiaohui Jiang,<sup>1</sup> Tonya Villafana,<sup>2</sup> Christopher Ambrose,<sup>2</sup> and Jon Fryzek<sup>1</sup>

<sup>1</sup>Epidstat Institute, Ann Arbor, Michigan; <sup>2</sup>AstraZeneca/Medimmune, Gaithersburg, Maryland

**Background.** Respiratory syncytial virus (RSV) is an established cause of serious lower respiratory disease in children, but the burden in adults is less well studied.

**Methods.** We conducted a retrospective study of hospitalizations among adults  $\geq 20$  years from the 1997–2012 National Inpatient Sample. Trends in RSV admissions were described relative to unspecified viral pneumonia admissions. Hospitalization severity indicators were compared among immunocompromised RSV, non-immunocompromised RSV, and influenza admissions.

**Results.** An estimated 28 237 adult RSV hospitalizations occurred, compared with 652 818 influenza hospitalizations; 34% were immunocompromised individuals. Respiratory syncytial virus and influenza patients had similar age, gender, and race distributions, but RSV was more often diagnosed in urban teaching hospitals (73.0% for RSV vs 34.6% for influenza) and large hospitals (71.9% vs 56.4%). Respiratory syncytial virus hospitalization rates increased from 1997 to 2012, particularly for those  $\geq 60$ , increasing from 0.5 to 4.6 per 100 000, whereas unspecified pneumonia admission rates decreased significantly ( $P < .001$ ). Immunocompromised patients with RSV hospitalization had significantly higher inpatient mortality ( $P = .013$ ), use of mechanical ventilation ( $P = .016$ ), mean length of stay (LOS) ( $P < .001$ ), and mean cost ( $P < .001$ ) than non-immunocompromised RSV hospitalizations. Overall, RSV hospitalizations were more severe than influenza hospitalizations (6.2% mortality for RSV vs 3.0% for influenza, 16.7% vs 7.2% mechanical ventilation, mean LOS of 6.0 vs 3.6 days, and mean cost of \$38 828 vs \$14 519).

**Conclusions.** Respiratory syncytial virus hospitalizations in adults are increasing, likely due to increasing recognition and diagnosis. The burden of RSV in adults deserves attention. Although there are fewer hospitalizations than influenza, those that are diagnosed are on average more severe.

**Keywords.** adult; hospitalizations; respiratory syncytial virus.

Respiratory syncytial virus (RSV) is well established as an important cause of serious lower respiratory disease in children, but the burden in adults is less well studied. Outbreaks identified in long-term care facilities in the late 1970s and early 1980s first drew attention to RSV as a potential cause of serious respiratory disease in older adults [1]. Studies of adults have reported the presence of RSV in 3%–12% of patients hospitalized with respiratory symptoms [2–4]. Respiratory syncytial virus has been confirmed in 1% to 8% of chronic obstructive pulmonary disease (COPD) exacerbations [5–10] and in 5% to 11% of adults admitted with pneumonia, COPD, heart failure, or asthma [2]. More recent evidence suggests that the burden of RSV-related illness among adults may approach or even exceed that of nonpandemic influenza A [2, 11–16].

Older adults are at higher risk for severe morbidity due to RSV [1–3, 11, 16, 17]. From 1995 to 2009 in the United

Kingdom, Fleming et al [13] found that older adults made up 79% of hospitalizations for RSV and 93% of deaths from RSV. The annual rate of disease caused by RSV in patients over 65 years of age has been estimated to be between 3% and 7% [2, 18–20]. In an influenza vaccine study of subjects 65 years and older conducted from 2008 to 2010, throat swabs were tested from subjects with influenza-like illness (ILI). Respiratory syncytial virus was found in 7.4% of nonhospitalized cases and in 12.5% of hospitalizations for ILI [3].

Immunocompromised adults, such as bone marrow transplant (BMT) recipients, are also at particularly high risk for severe RSV illness. A study of RSV in immunocompromised patients reported an RSV-related mortality rate of 36% overall and 50% in BMT patients [21]. In another study, mortality rates for BMT patients with RSV ranged from 30% to 70% [4]. Respiratory syncytial virus was diagnosed in 15% of BMT recipients hospitalized for respiratory illnesses, which progressed to pneumonia in 61% of these patients [22]. These studies suggest that significant morbidity and mortality can occur in immunocompromised patients diagnosed with RSV, but more information is needed to demonstrate the role and severity of RSV in adults for the US healthcare system at large.

Inpatient hospital discharge data can be used (1) to examine the importance of diagnosed RSV as a factor in hospitalizations

Received 4 August 2016; editorial decision 20 December 2016; accepted 3 January 2017.  
 Correspondence: S. T. Pastula, MPH, Epidstat Institute, 2100 Commonwealth, Suite 203, Ann Arbor, MI 48105 (sue@epidstat.com).

## Open Forum Infectious Diseases®

© The Author 2017. Published by Oxford University Press on behalf of Infectious Diseases Society of America. This is an Open Access article distributed under the terms of the Creative Commons Attribution License (<http://creativecommons.org/licenses/by/4.0/>), which permits unrestricted reuse, distribution, and reproduction in any medium, provided the original work is properly cited.  
 DOI: 10.1093/ofid/ofw270

in adults over time and its association with other reported comorbidities and (2) to contextualize these results with influenza as a more commonly recognized cause of severe outcomes in adults with respiratory disease. Our study characterizes the trends in hospitalizations attributed to RSV infections among adults 20 years or older in the United States from 1997 to 2012 using nationally representative inpatient hospital discharge data. We compared severity indicators, including inpatient deaths, use of mechanical ventilations, length of stay (LOS), and costs, among immunocompromised adults with RSV, non-immunocompromised adults with RSV, and adults hospitalized for influenza.

## METHODS

A retrospective study of RSV hospitalizations among adults ( $\geq 20$  years) was conducted using discharge data from the Nationwide Inpatient Sample (NIS), Healthcare Cost and Utilization Project (HCUP), and Agency for Healthcare Research and Quality (AHRQ) for the years 1997 to 2012. The NIS is a nationally representative sample of hospital inpatient stays developed by the HCUP and sponsored by the AHRQ. Data are contributed from the HCUP State Inpatient Databases (<http://www.hcup-us.ahrq.gov/db/hcupdatapartners.jsp>) and include records for more than 7 million all-payer hospital stays each year [23].

Nationwide Inpatient Sample data contain up to 25 diagnostic codes for each hospitalization, based on the *International Classification of Diseases, Ninth Revision, Clinical Modification* ([ICD-9-CM] hereafter, simply ICD-9). During the study years, there were 3 RSV-specific ICD-9 codes: 480.1, pneumonia due to RSV; 466.11, bronchiolitis due to RSV; and 079.6, RSV. Our analysis included all hospitalizations occurring in adults  $\geq 20$  years of age with at least 1 of the 3 RSV-specific ICD-9 codes listed in any diagnostic position in their hospitalization record.

Hospitalization rates for 1997–2012 were calculated using the weighted estimate of total number of annual hospitalizations due to RSV relative to the US population estimates from annual US Census data. To investigate rates by age, hospitalized individuals were categorized as 20 to 44 years, 45 to 59 years, or 60 years and older. Hospitalization rates were calculated as numbers of cases per 100 000 for each age group by year.

We also analyzed rates of RSV compared with those of pneumonia virus unspecified, defined as ICD-9 480.9. The objective was to understand whether any observed changes in RSV hospitalization incidence were driven by changes in RSV diagnosis frequency or true disease incidence.

For comparison of disease burden, we also assessed adult hospitalizations for influenza, defined as ICD-9 codes 487–488. If a hospitalization had codes for both RSV and influenza, it was counted toward both populations. To examine the burden of disease for RSV and influenza, we compared distribution by

hospital characteristics such as geographical area, hospital type (urban teaching/urban nonteaching/rural), and bedsize, using definitions included in the NIS database [23].

We analyzed disease severity using several indicators recorded in the NIS, including inpatient mortality, LOS, use of mechanical ventilation, and total cost. Costs were adjusted to 2015 US dollars. These indicators were examined for the entire study period and by year to examine potential time trends. To investigate any temporal bias effects, we repeated the analyses of hospital characteristics and severity after restricting the data to only the 3 most recent years. Because they were expected to experience differences in disease outcomes, hospitalization records were classified as being in adults who were immunocompromised or not based on an existing AHRQ algorithm based on ICD-9-CM diagnosis and procedure codes [24]. Individuals' hospitalization records were classified as immunocompromised if they had at least 1 of these qualifying diagnostic or procedural codes in any position.

All data management and statistical analyses for this study were carried out using SAS version 9.3 (SAS Institute Inc., Cary, NC), with procedures that incorporated NIS-provided weights to account for the structure of the sample survey data. There was no imputation of missing values in any analysis. The temporal trend in incidence rates by age group was assessed by Poisson regression. Logistic regression was used to examine temporal trends in mechanical ventilation and inpatient mortality. Because lengths of hospitalization stay and total hospitalization charges were not normally distributed, geometric means were calculated. Linear regression was used to test temporal trends in lengths of hospitalization stay and total hospitalization charges.

## RESULTS

### Patient Characteristics

A total of 28 237 RSV inpatient hospitalizations were identified in adults in the 1997 to 2012 NIS database, distributed as follows: 480.1, pneumonia due to RSV (43.6%); 466.11, bronchiolitis due to RSV (11.4%); and 079.6, RSV (47.6%). A total of 33.6% of RSV admissions were classified as immunocompromised (Table 1). Overall, RSV hospitalizations were more common in those who were 60 and older (57.8%), female (56.6%), and non-Hispanic white (60.8%). Non-immunocompromised RSV patients were more often female (62.1%), but immunocompromised RSV patients were less often female (45.7%). A higher proportion (80.7%) of adult RSV hospitalizations occurred in the winter months between December and March than in the other 8 months of the year (data not shown). An association was observed between RSV hospitalization and immunocompromised status.

Influenza was more commonly diagnosed in the NIS than was RSV: 652 818 influenza patients were identified, nearly 23 times

**Table 1. Characteristics of RSV Patients, 1997–2012, Compared to Influenza Patients by Immunocompromised Status and Pneumonia Virus Unspecified**

| Characteristic       | RSV<br>n (%) IC | RSV<br>n (%) Not IC | RSV<br>n (%) Total | Influenza<br>n (%) IC | Influenza<br>n (%) Not IC | Influenza<br>n (%) Total | Pneumonia, Virus<br>Unspec. n (%) Total |
|----------------------|-----------------|---------------------|--------------------|-----------------------|---------------------------|--------------------------|-----------------------------------------|
| Total                | 9483 (33.6%)    | 18 754 (66.4%)      | 28 237 (100%)      | 66 944 (10.3%)        | 585 874 (89.7%)           | 652 818 (100%)           | 149 433 (100%)                          |
| Age (years)          |                 |                     |                    |                       |                           |                          |                                         |
| 20–44                | 2157 (22.7%)    | 2904 (15.5%)        | 5061 (17.9%)       | 12 705 (19.0%)        | 125 845 (21.5%)           | 138 549 (21.2%)          | 32 758 (21.9%)                          |
| 45–59                | 3208 (33.8%)    | 3653 (19.5%)        | 6861 (24.3%)       | 16 510 (24.7%)        | 113 842 (19.4%)           | 130 352 (20.0%)          | 33 794 (22.6%)                          |
| 60+                  | 4118 (43.4%)    | 12 198 (65.0%)      | 16 316 (57.8%)     | 37 729 (56.4%)        | 346 188 (59.1%)           | 383 916 (58.8%)          | 82 882 (55.5%)                          |
| Gender               |                 |                     |                    |                       |                           |                          |                                         |
| Male                 | 5147 (54.3%)    | 7108 (37.9%)        | 12 255 (43.4%)     | 35 634 (53.3%)        | 232 604 (39.7%)           | 268 238 (41.1%)          | 60 280 (40.4%)                          |
| Female               | 4331 (45.7%)    | 11 646 (62.1%)      | 15 977 (56.6%)     | 31 282 (46.7%)        | 353 060 (60.3%)           | 384 342 (58.9%)          | 89 109 (59.6%)                          |
| Race or Ethnic Group |                 |                     |                    |                       |                           |                          |                                         |
| Non-Hispanic White   | 5744 (60.6%)    | 11 413 (60.9%)      | 17 157 (60.8%)     | 34 309 (51.3%)        | 339 918 (58.0%)           | 374 228 (57.3%)          | 91 406 (61.2%)                          |
| Non-Hispanic Black   | 1209 (12.8%)    | 1856 (9.9%)         | 3065 (10.9%)       | 10 447 (15.6%)        | 48 015 (8.2%)             | 58 462 (9.0%)            | 11 871 (7.9%)                           |
| Hispanic             | 735 (7.8%)      | 1220 (6.5%)         | 1955 (6.9%)        | 5623 (8.4%)           | 35 440 (6.0%)             | 41 063 (6.3%)            | 8016 (5.4%)                             |
| Other or Unknown     | 1794 (18.9%)    | 4265 (22.7%)        | 6060 (21.5%)       | 16 564 (24.7%)        | 162 501 (27.7%)           | 179 065 (27.4%)          | 38 140 (25.5%)                          |

Abbreviations: IC, immunocompromised; RSV, respiratory syncytial virus; Unspec., unspecified.

the number of RSV hospitalizations. The vast majority of influenza cases were in patients that were not immunocompromised (89.7%), but the age, gender, and racial distributions of patients with influenza were not appreciably different than those of RSV (Table 1). Six hundred eighty-three hospitalizations had both RSV and influenza diagnosis codes, equaling 2.4% of all RSV admissions and 0.1% of all influenza admissions.

A total of 149 433 admissions for pneumonia, virus unspecified were identified between 1997 and 2012. Patients with this diagnosis were more often 60 and older (55.5%), female (59.6%), and non-Hispanic white (61.2%).

### Hospital Characteristics

Both RSV and influenza hospitalizations were slightly more likely to be from the southern United States than other regions of the country and slightly less likely from the West (Table 2).

Respiratory syncytial virus cases were identified most often in urban teaching hospitals (73.0%) and large hospitals (71.9%) as opposed to smaller facilities (9.9%). An even larger proportion of immunocompromised RSV patients were diagnosed in urban teaching hospitals (88.8%) and large hospitals (80.5%). In contrast, influenza hospitalizations were more evenly distributed between rural (26.2%), urban nonteaching (39.2%), and urban teaching hospitals (34.6%). Immunocompromised influenza patients were most often seen in urban teaching hospitals (51.1%), but those who were not immunocompromised were commonly treated in urban nonteaching (39.6%) and urban teaching (32.8%) hospitals. Pneumonia virus unspecified patients had similar distributions to influenza; they were most often from the southern United States (37.4%). They were identified in urban nonteaching hospitals most frequently (42.5%) and large hospitals (57.1%).

**Table 2. Hospital Characteristics of RSV, 1997–2012, Compared to Influenza by Immunocompromised Status and Pneumonia Virus Unspecified**

| Hospital<br>Characteristic | RSV<br>n (%) IC | RSV<br>n (%) Not IC | RSV<br>n (%) Total | Influenza<br>n (%) IC | Influenza<br>n (%) Not IC | Influenza<br>n (%) Total | Pneumonia,<br>Virus Unspec.<br>n (%) Total |
|----------------------------|-----------------|---------------------|--------------------|-----------------------|---------------------------|--------------------------|--------------------------------------------|
| Total                      | 9483 (33.6%)    | 18 754 (66.4%)      | 28 237 (100%)      | 66 944 (10.3%)        | 585 874 (89.7%)           | 652 818 (100%)           | 149 433 (100%)                             |
| Region                     |                 |                     |                    |                       |                           |                          |                                            |
| NE                         | 1954 (22.7%)    | 4527 (26.3%)        | 6481 (25.1%)       | 11 382 (18.2%)        | 89 130 (15.9%)            | 100 512 (16.1%)          | 20 721 (14.4%)                             |
| Midwest                    | 2041 (23.7%)    | 4841 (28.1%)        | 6882 (26.6%)       | 18 462 (29.5%)        | 174 603 (31.1%)           | 193 065 (30.9%)          | 37 056 (25.7%)                             |
| South                      | 2639 (30.6%)    | 4610 (26.8%)        | 7249 (28.1%)       | 22 001 (35.2%)        | 215 460 (38.4%)           | 237 461 (38.1%)          | 54 028 (37.4%)                             |
| West                       | 1983 (23.0%)    | 3247 (18.9%)        | 5231 (20.2%)       | 10 684 (17.1%)        | 82 267 (14.7%)            | 92 951 (14.9%)           | 32 582 (22.6%)                             |
| Location                   |                 |                     |                    |                       |                           |                          |                                            |
| Rural                      | 126 (1.5%)      | 1615 (9.5%)         | 1741 (6.8%)        | 8536 (13.7%)          | 154 446 (27.6%)           | 162 982 (26.2%)          | 33 010 (23%)                               |
| Urban nonteaching          | 832 (9.7%)      | 4336 (25.4%)        | 5168 (20.2%)       | 21 901 (35.2%)        | 221 756 (39.6%)           | 243 657 (39.2%)          | 61 093 (42.5%)                             |
| Urban teaching             | 7612 (88.8%)    | 11 091 (65.1%)      | 18 703 (73.0%)     | 31 806 (51.1%)        | 183 351 (32.8%)           | 215 157 (34.6%)          | 49 672 (34.5%)                             |
| Bedsize                    |                 |                     |                    |                       |                           |                          |                                            |
| Small                      | 503 (5.9%)      | 2043 (12.0%)        | 2546 (9.9%)        | 7400 (11.9%)          | 105 106 (18.8%)           | 112 506 (18.1%)          | 22 419 (15.6%)                             |
| Medium                     | 1171 (13.7%)    | 3477 (20.4%)        | 4648 (18.1%)       | 12 950 (20.8%)        | 145 675 (26.0%)           | 158 625 (25.5%)          | 39 279 (27.3%)                             |
| Large                      | 6896 (80.5%)    | 11 523 (67.6%)      | 18 419 (71.9%)     | 41 892 (67.3%)        | 308 772 (55.2%)           | 350 664 (56.4%)          | 82 076 (57.1%)                             |

Abbreviations: IC, immunocompromised; NE, North East; RSV, respiratory syncytial virus; Unspec., unspecified.

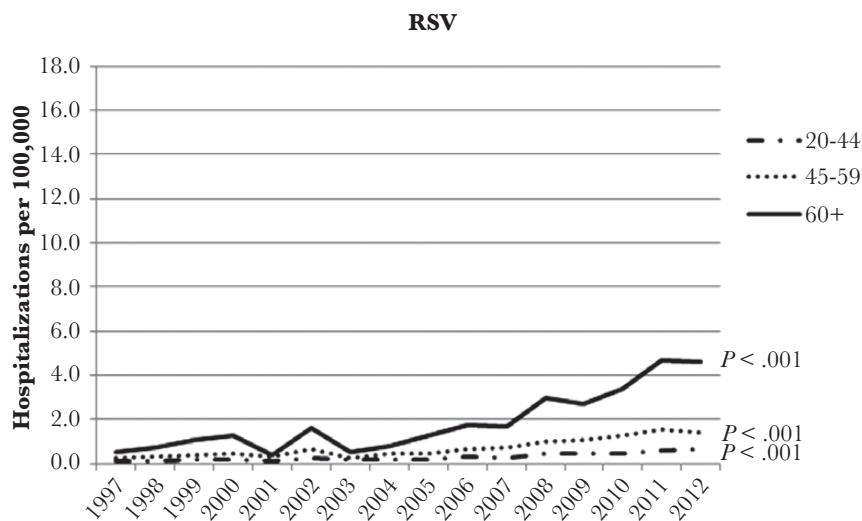

**Figure 1.** Trends in respiratory syncytial virus (RSV) hospitalization rates by year and age group, 1997–2012.

### Trends

Figure 1 shows the annual age-stratified RSV hospitalization rates per 100 000 persons. The rate of RSV hospitalizations increased significantly for all ages between 1997 and 2012 ( $P < .001$ ), most dramatically so for patients 60 years and older. The hospitalization rate in this group increased by 8.6-fold from 0.54 to 4.64 per 100 000 over the 16-year period. In contrast to the RSV rates, there was a significant decrease in pneumonia virus unspecified admissions among those 60 and older in the same timeframe ( $P < .001$ ) (Figure 2). Pneumonia virus unspecified admission rates among 20- to 44-year-olds and 45- to 59-year-olds had nonsignificant decreases ( $P = .617$  and  $P = .622$ , respectively).

### Indicators of Severity and Hospitalization Costs

Frequency of death increased with age, from 4.1% of 20- to 44-year-olds with RSV to 6.2% of 45- to 59-year-olds to 6.9% of inpatients 60 and older (Table 3). Thus, the majority of all RSV-related deaths occurred amongst those 60 and older (63.8% = 1118 of 1751 total RSV deaths). However, mechanical ventilation use, LOS, and costs were highest in 45- to 59-year-olds. Compared with non-immunocompromised patients, immunocompromised patients with RSV were more likely to die during hospitalization (7.3% vs 5.6%,  $P = .013$ ), had longer mean LOS (7.3 days vs 5.4 days,  $P < .001$ ), and had higher mean cost (\$66 476 vs \$29 316,  $P < .001$ ), but were less likely to receive mechanical ventilation (14.6% vs 17.7%,  $P = .016$ ).

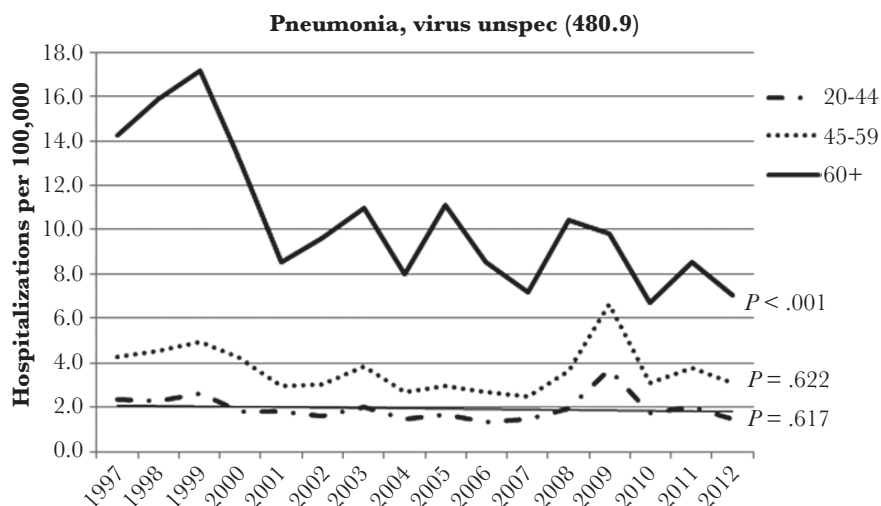

**Figure 2.** Trends in pneumonia, virus unspecified ([unspec.] *International Classification of Diseases, Ninth Revision, Clinical Modification* 480.9) by year and age group, 1997–2012.

**Table 3. Indicators of Severity for RSV Hospitalizations, 1997–2012, Compared to Influenza Hospitalizations by Immunocompromised Status and Pneumonia Virus Unspecified**

| Severity Indicator                 | RSV<br>n (%) IC | RSV<br>n (%) Not IC | RSV<br>n (%) Total | Influenza<br>n (%) IC | Influenza<br>n (%) Not IC | Influenza<br>n (%) Total | Pneumonia Virus<br>Unspec. n (%) Total |
|------------------------------------|-----------------|---------------------|--------------------|-----------------------|---------------------------|--------------------------|----------------------------------------|
| Total Hospitalizations             | 9483 (33.6%)    | 18754 (66.4%)       | 28237 (100%)       | 66944 (10.3%)         | 585874 (89.7%)            | 652818 (100%)            | 149433 (100%)                          |
| Died during hospitalization        | 695 (7.3%)      | 1056 (5.6%)         | 1751 (6.2%)        | 3833 (5.7%)           | 15873 (2.7%)              | 19706 (3.0%)             | 5359 (3.6%)                            |
| Age 20–44                          | 139 (6.4%)      | 71 (2.4%)           | 210 (4.1%)         | 507 (4.0%)            | 1519 (1.2%)               | 2026 (1.5%)              | 514 (1.6%)                             |
| Age 45–59                          | 267 (8.3%)      | 156 (4.3%)          | 423 (6.2%)         | 923 (5.6%)            | 2321 (2.0%)               | 3244 (2.5%)              | 706 (2.1%)                             |
| Age 60+                            | 289 (7.0%)      | 828 (6.8%)          | 1118 (6.9%)        | 2402 (6.3%)           | 12033 (3.5%)              | 14436 (3.8%)             | 4139 (5.0%)                            |
| Mechanical ventilation use         | 1389 (14.6%)    | 3319 (17.7%)        | 4708 (16.7%)       | 7899 (11.8%)          | 38877 (6.6%)              | 46777 (7.2%)             | 13449 (9.0%)                           |
| Age 20–44                          | 262 (12.1%)     | 452 (15.6%)         | 714 (14.1%)        | 1380 (10.9%)          | 8131 (6.5%)               | 9510 (6.9%)              | 3127 (9.5%)                            |
| Age 45–59                          | 469 (14.6%)     | 810 (22.2%)         | 1279 (18.6%)       | 2475 (15.0%)          | 10655 (9.4%)              | 13130 (10.1%)            | 3670 (10.9%)                           |
| Age 60+                            | 657 (16.0%)     | 2058 (16.9%)        | 2715 (16.6%)       | 4045 (10.7%)          | 20092 (5.8%)              | 24137 (6.3%)             | 6652 (8.0%)                            |
| Length of stay (days) <sup>a</sup> | 7.3             | 5.4                 | 6.0                | 4.8                   | 3.5                       | 3.6                      | 4.3                                    |
| Age 20–44                          | 7.4             | 4.6                 | 5.6                | 4.1                   | 2.6                       | 2.7                      | 3.6                                    |
| Age 45–59                          | 7.5             | 5.3                 | 6.2                | 4.8                   | 3.3                       | 3.5                      | 4.2                                    |
| Age 60+                            | 7.1             | 5.6                 | 6.0                | 5.1                   | 4.0                       | 4.1                      | 4.7                                    |
| Adjusted cost (\$) <sup>a</sup>    | 66476.1         | 29316.2             | 38827.6            | 25198.5               | 13634.9                   | 14519.1                  | 18051.2                                |
| Age 20–44                          | 71822.3         | 27021.1             | 41202.0            | 24070.5               | 11831.5                   | 12627.4                  | 16950.0                                |
| Age 45–59                          | 73896.5         | 33196.5             | 48431.2            | 29294.9               | 14761.9                   | 16098.0                  | 19473.9                                |
| Age 60+                            | 58648.8         | 28785.8             | 34609.1            | 23958.1               | 13985.2                   | 14742.5                  | 17940.8                                |

Abbreviations: IC, immunocompromised; RSV, respiratory syncytial virus; Unspec., unspecified.

<sup>a</sup>Geometric mean.

There were more than 10 times as many in-hospital deaths with diagnoses of influenza compared with RSV, but death occurred in only 3.0% of influenza hospitalizations and 3.6% of pneumonia virus unspecified hospitalizations compared with 6.2% of RSV hospitalizations. The average LOS for RSV was 6.0 days, compared with 3.6 days for influenza, and 4.3 days for pneumonia virus unspecified. Relatedly, the mean adjusted costs for RSV hospitalizations were higher (\$38 828) than those for influenza (\$14 519) or unspecified pneumonia (\$18 051) hospitalizations.

When more recent data (2010–2012) were examined separately, the patterns of severity were similar to those observed in the full 16-year dataset (Supplemental Table 1). Recent RSV hospitalizations had lower mortality than the full dataset (5.1% vs 6.2%) but higher mechanical ventilation use (17.5% vs 16.7%). Although the average LOS from 2010 to 2012 was slightly shorter than the overall dataset (5.6 days vs 6.0 days), the mean adjusted cost per case was higher for recent RSV at \$43 328, compared with \$38 828. The higher severity of RSV versus influenza hospitalizations was also present in 2010–2012, with higher frequency of mortality (5.1% for RSV vs 3.3% for influenza), more frequent use of mechanical ventilation (17.5% vs 11.1%), longer LOS (5.6 vs 3.6 days), and higher cost per hospitalizations (\$43 328 vs \$22 631).

## DISCUSSION

In our study of adults hospitalized for RSV, identified by use of ICD-9 codes, we found an abrupt increase in the rate of

hospitalizations of RSV starting approximately in 2007, especially in older adults ( $\geq 60$  years). We observed an overall decrease in rates of pneumonia virus unspecified for this age group, which suggests that this pattern is due to increased recognition (and diagnosis) of RSV as an important cause of disease in older adults rather than true increases in incidence. This is also consistent with our observation that RSV was identified more often in urban teaching hospitals than in smaller or rural hospitals, although this could also (1) be related to transfer of complex cases to tertiary care centers or (2) due to molecular diagnostic testing being more accessible in a teaching facility. As awareness and testing for RSV in adults continues to increase, more effective treatments can be administered, likely limiting improper use of antibiotics.

Although counts of diagnosed RSV hospitalizations in adults are still dwarfed by those of influenza, individuals hospitalized with RSV had more severe illness compared with those hospitalized with influenza. This observation of elevated severity is consistent with data from other sources. A prospective study conducted between 1975 and 1995 in healthy working-age adults found the duration of RSV illness to be longer than that of influenza (9.5 days vs 6.8 days) [19, 25]. In our analysis, 16.7% of RSV hospitalizations required mechanical ventilation, similar to a 2010 review that reported that 3.2%–13% of adult RSV patients required assisted ventilation [26]. Because it is possible that more severe cases are more likely to be diagnosed, further evidence is needed to confirm the degree of severity in RSV hospitalizations observed in this study as diagnosis becomes more common, but the present findings suggest the importance

of increased awareness that RSV can be an important cause of disease in adults. These results also provide further evidence that the risk of serious RSV disease is particularly high among immunocompromised adults, consistent with previous observations [4, 21, 22].

Our study methodology had several inherent limitations. Using ICD-9-coded administrative data will underestimate RSV incidence, because these are the most symptomatic cases in the community needing hospitalization. Not all hospitalizations receive diagnostic testing to identify the causal pathogen. The burden of RSV disease is particularly likely to be underestimated in adults, because testing adult respiratory specimens for RSV is generally not standard practice. Several authors have reported that RSV infections are rarely diagnosed in adults, in part because available rapid antigen detection tests were insensitive in adults and because medical practitioners rarely request tests for RSV for this age group [1, 17, 27]. The trend in increasing diagnosis of RSV may have resulted from the development of improved sensitivity in diagnostic testing in recent years, causing the demonstrated shift in cases from another respiratory diagnosis to RSV.

Although lack of diagnostic testing may have led to underestimation of the total number of hospitalizations related to RSV, these codes are the most specific method of identifying RSV-related hospitalizations in data based on ICD-9 codes alone. All diagnostic code positions were used to prevent underestimations and biases related to variability in decisions about diagnostic priority across regions and more than a decade of data.

The strength of this study lies in the size and quality of the database analyzed. The NIS database is a representative sample of all hospitalizations in the United States, so this analysis of the hospital admissions for RSV, influenza, and non-RSV pneumonia is generalizable to the total US population. Fifteen years of data provided the ability to look at trends across years, and this allowed us to analyze healthcare use patterns by geographic area, as well as hospital type and size. Because of the large amount of data in the NIS, examining a relatively rarely reported disease such as RSV is possible.

## CONCLUSIONS

Respiratory syncytial virus is a serious respiratory disease in children that is being increasingly recognized as a serious cause of illness in adults. The incidence of diagnosed RSV hospitalizations, especially in older adults, has increased significantly in the United States. As clinicians become more aware of and diagnose more cases of RSV, rates may continue to climb. Respiratory syncytial virus hospitalizations appear to be consistently more severe than influenza hospitalizations, especially for older adults and those that are immunocompromised, with greater clinical and economic burden. Respiratory syncytial virus disease deserves attention as a potentially severe cause of respiratory hospitalizations in adults.

## Supplementary Data

Supplementary materials are available at *Open Forum Infectious Diseases* online. Consisting of data provided by the authors to benefit the reader, the posted materials are not copyedited and are the sole responsibility of the authors, so questions or comments should be addressed to the corresponding author.

## Acknowledgments

**Financial support.** This work was funded by AstraZeneca.

**Potential conflicts of interest.** J. H., T. V., and C. A. are shareholders in AstraZeneca/MedImmune. S. T. P., J. C., X. J., and J. F. are consultants to AstraZeneca.

All authors have submitted the ICMJE Form for Potential Conflicts of Interest. Conflicts that the editors consider relevant to the content of the manuscript have been disclosed.

## References

1. Falsey AR, Walsh EE. Respiratory syncytial virus infection in adults. *Clin Microbiol Rev* **2000**; 13:371–84.
2. Falsey AR, Hennessey PA, Formica MA, et al. Respiratory syncytial virus infection in elderly and high-risk adults. *N Engl J Med* **2005**; 352:1749–59.
3. Falsey AR, McElhaney JE, Beran J, et al. Respiratory syncytial virus and other respiratory viral infections in older adults with moderate to severe influenza-like illness. *J Infect Dis* **2014**; 209:1873–81.
4. Branche AR, Falsey AR. Respiratory syncytial virus infection in older adults: an under-recognized problem. *Drugs Aging* **2015**; 32:261–9.
5. McManus TE, Marley AM, Baxter N, et al. Respiratory viral infection in exacerbations of COPD. *Respir Med* **2008**; 102:1575–80.
6. Beckham JD, Cadena A, Lin J, et al. Respiratory viral infections in patients with chronic, obstructive pulmonary disease. *J Infect* **2005**; 50:322–30.
7. Camargo CA Jr, Ginde AA, Clark S, et al. Viral pathogens in acute exacerbations of chronic obstructive pulmonary disease. *Intern Emerg Med* **2008**; 3:355–9.
8. De Serres G, Lampron N, La Forge J, et al. Importance of viral and bacterial infections in chronic obstructive pulmonary disease exacerbations. *J Clin Virol* **2009**; 46:129–33.
9. Hutchinson AF, Ghimire AK, Thompson MA, et al. A community-based, time-matched, case-control study of respiratory viruses and exacerbations of COPD. *Respir Med* **2007**; 101:2472–81.
10. Mohan A, Chandra S, Agarwal D, et al. Prevalence of viral infection detected by PCR and RT-PCR in patients with acute exacerbation of COPD: a systematic review. *Respirology* **2010**; 15:536–42.
11. Matias G, Taylor R, Haguinet F, et al. Estimates of mortality attributable to influenza and RSV in the United States during 1997–2009 by influenza type or subtype, age, cause of death, and risk status. *Influenza Other Respir Viruses* **2014**; 8:507–15.
12. Nicholson KG. Impact of influenza and respiratory syncytial virus on mortality in England and Wales from January 1975 to December 1990. *Epidemiol Infect* **1996**; 116:51–63.
13. Fleming DM, Taylor RJ, Lustig RL, et al. Modelling estimates of the burden of respiratory syncytial virus infection in adults and the elderly in the United Kingdom. *BMC Infect Dis* **2015**; 15:443.
14. Chan PK, Tam WW, Lee TC, et al. Hospitalization incidence, mortality, and seasonality of common respiratory viruses over a period of 15 years in a developed subtropical city. *Medicine (Baltimore)* **2015**; 94:e2024.
15. Han LL, Alexander JP, Anderson LJ. Respiratory syncytial virus pneumonia among the elderly: an assessment of disease burden. *J Infect Dis* **1999**; 179:25–30.
16. Widmer K, Zhu Y, Williams JV, et al. Rates of hospitalizations for respiratory syncytial virus, human metapneumovirus, and influenza virus in older adults. *J Infect Dis* **2012**; 206:56–62.
17. Thompson WW, Shay DK, Weintraub E, et al. Mortality associated with influenza and respiratory syncytial virus in the United States. *JAMA* **2003**; 289:179–86.
18. Diez-Domingo J, Pérez-Yarza EG, Melero JA, et al. Social, economic, and health impact of the respiratory syncytial virus: a systematic search. *BMC Infect Dis* **2014**; 14:544.
19. Nicholson KG, Kent J, Hammersley V, Cancio E. Acute viral infections of upper respiratory tract in elderly people living in the community: comparative, prospective, population based study of disease burden. *BMJ* **1997**; 315:1060–4.
20. Walsh EE, Peterson DR, Falsey AR. Risk factors for severe respiratory syncytial virus infection in elderly persons. *J Infect Dis* **2004**; 189:233–8.
21. Englund JA, Sullivan CJ, Jordan MC, et al. Respiratory syncytial virus infection in immunocompromised adults. *Ann Intern Med* **1988**; 109:203–8.
22. Whimbey E, Champlin RE, Couch RB, et al. Community respiratory virus infections among hospitalized adult bone marrow transplant recipients. *Clin Infect Dis* **1996**; 22:778–82.

23. HCUP. Introduction to the HCUP National Inpatient Sample (NIS) 2013: Agency for Healthcare Research and Quality Healthcare Cost and Utilization Project (HCUP), 2015. Available at: <http://www.hcup-us.ahrq.gov/db/hcupdatapartners.jsp>. Accessed 1 October 2015.
24. AHRQ. AHRQ Quality Indicators: Patient Safety Indicators-Technical Specifications: Department of Health and Human Services, 2006. Available at: [http://www.qualityindicators.ahrq.gov/downloads/modules/psi/v30/psi\\_technical\\_specs\\_v30.pdf](http://www.qualityindicators.ahrq.gov/downloads/modules/psi/v30/psi_technical_specs_v30.pdf). Accessed 15 September 2015.
25. Hall CB, Long CE, Schnabel KC. Respiratory syncytial virus infections in previously healthy working adults. *Clin Infect Dis* 2001; 33:792–6.
26. Prescott WA Jr, Doloresco F, Brown J, Paladino JA. Cost effectiveness of respiratory syncytial virus prophylaxis: a critical and systematic review. *Pharmacoeconomics* 2010; 28:279–93.
27. Casiano-Colón AE, Hulbert BB, Mayer TK, et al. Lack of sensitivity of rapid antigen tests for the diagnosis of respiratory syncytial virus infection in adults. *J Clin Virol* 2003; 28:169–74.
